# Supplementary material for: Ultrafast transformation of PbI2 in two-step fabrication of halide perovskite films for long-term performance and stability via nanosecond laser shock annealing
Source: Royal Society of Chemistry journal article supplement (doi:10.1039/d1tc02475b), 2021-01-01
Supplement: d1tc02475b1.pdf [file d1tc02475b1.pdf]

## Support information for

### Ultrafast Transformation of PbI<sub>2</sub> in Two-Step Fabrication of Halide Perovskite Film for Long-Term Performance and Stability via Nanosecond Laser Shock Annealing

Huanrui Yang<sup>1,†</sup>, Chunpeng Song<sup>1,\*</sup>, Tiancheng Xia<sup>1</sup>, Shifeng Li<sup>1</sup>, Dingyue Sun<sup>1</sup>, Feng Liu<sup>1</sup>, Gary J. Cheng<sup>1,2,3\*</sup>

<sup>1</sup>The Institute of Technological Sciences, Wuhan University, Wuhan 430072, China

<sup>2</sup>Brick Nanotechnology Center, Purdue University, West Lafayette, IN, USA

<sup>3</sup>School of Industrial Engineering, Purdue University, West Lafayette, IN, USA

\*Corresponding authors: songchunpeng@whu.edu.cn, gjcheng@purdue.edu.

#### Methods

*1. Materials:* Methylammonium iodide (MAI, purity >99.5%), Lead (II) iodide (PbI<sub>2</sub>, purity >99.99%) and Formamidinium iodide (FAI, purity >99.5%) purchased from Xi'an Polymer Light Technology Corp. Methylammonium chloride (MACl, purity>99.5%) and 2-Propanol (IPA, purity>99.5%) were purchased from Libra Tech and Aladdin, respectively. Dimethyl sulfoxide (DMSO, purity>99.5%) and N, N-Dimethylformamide (DMF, purity>99.8%) were purchased from Sigma-Aldrich. All materials are used as received.

*2.FA<sub>0.95</sub>MA<sub>0.05</sub>PbI<sub>3</sub> film preparation:* High transmittance fluorine-doped tin oxide (FTO) conductive glass substrate was ultrasonic cleaned with deionized water, acetone, and IPA for 20 minutes, then dried in a vacuum drying oven for 30 minutes. Subsequently, the FTO glass was cleaned with ultraviolet ozone for 20 min. 1.5 M of PbI<sub>2</sub> dissolve in DMF: DMSO (9:1) mixed solvent was dynamic spin-coated onto FTO glass at 2000 r.p.m. for 30s, then annealed at 70°C for 1 min, and cooled to room temperature for 5 min. After that, a solution of FAI: MAI: MACl (90 mg: 6.39 mg: 9 mg dissolved in 1ml IPA) was dropped onto the surface of PbI<sub>2</sub>, spin coating at 2000 r.p.m. for 30s. Nanosecond laser radiation is performed immediately after the wet film is spin-coated (1064 nm, 25 W, pulse duration: 20 ns, scanning speed 300-500 mm/s, beam diameter: 100 μm). For comparison, the film was subjected to thermal annealing, and the annealing temperature is 150°C for 15 min.

*3.Material characterization:* The morphology of FA<sub>0.95</sub>MA<sub>0.05</sub>PbI<sub>3</sub> film was obtained by field emission scanning electron microscopy (FE-SEM, Zeiss SIGMA). The XRD patterns were obtained by Bruker D8 Venture. X-ray photoelectron spectroscopy (XPS) and ultraviolet photoelectron spectroscopy (UPS) data were measured by Thermo Fisher Scientific

1 ESCALAB250Xi. Raman patterns of perovskite films were characterized by RM1000 for laser  
2 excitation at 514.5 nm. PE Lambd 950 was used to perform the ultraviolet-visible absorption  
3 (UV-Vis) to obtain the optical bandgap. Steady-state photoluminescence of perovskite films  
4 was characterized by FLS 980 for laser excitation at 532 nm. Time-resolved  
5 photoluminescence (TRPL) data were collected by FLS1000 using 532 nm laser excitation. A  
6 layer of gold was deposited on the surface of the perovskite film, the carrier concentration of  
7 the film, the carrier mobility in the film, and the resistivity of the film was obtained by the Hall  
8 test. Photocurrent measurement was carried out on the  $\text{FA}_{0.95}\text{MA}_{0.05}\text{PbI}_3$  photodetector with  
9 the structure of  $\text{Au}/\text{FA}_{0.95}\text{MA}_{0.05}\text{PbI}_3/\text{Au}$ , which was measured by Keysight B2901A  
10 oscilloscope under 355 nm laser radiation (Power density,  $5 \text{ mW}/\text{cm}^2$ , effective area  $1.2 \times 10^{-3}$   
11  $\text{mm}^2$ ). Thermogravimetric analysis (TGA) of perovskite films has an important application in  
12 thermal stability analysis of perovskite by using Mettler-Toledo TGA2.

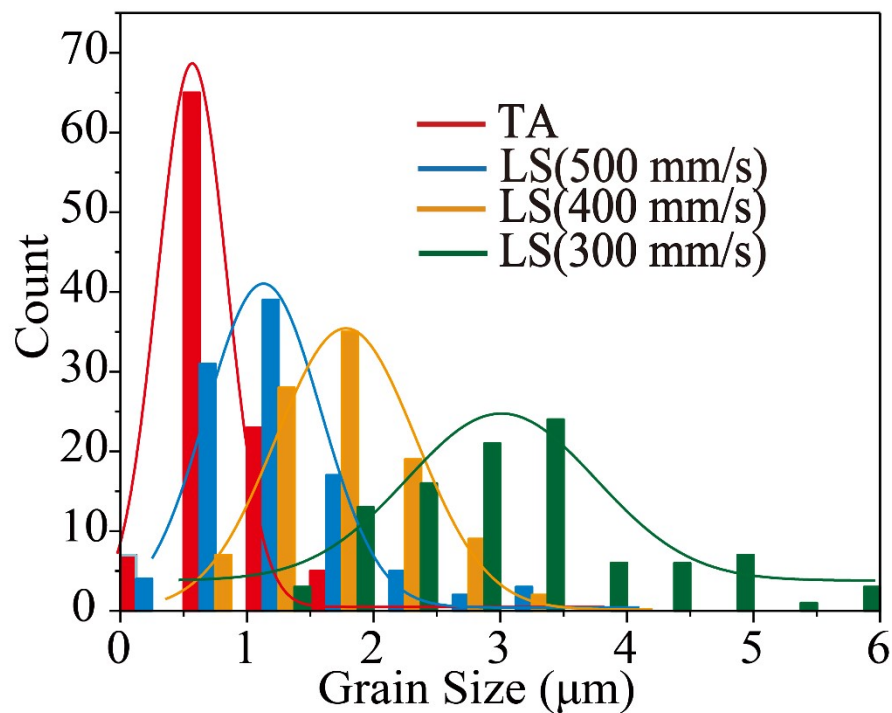

13

14 **Figure S1.** Grain size distribution of  $\text{FA}_{0.95}\text{MA}_{0.05}\text{PbI}_3$  perovskite films.

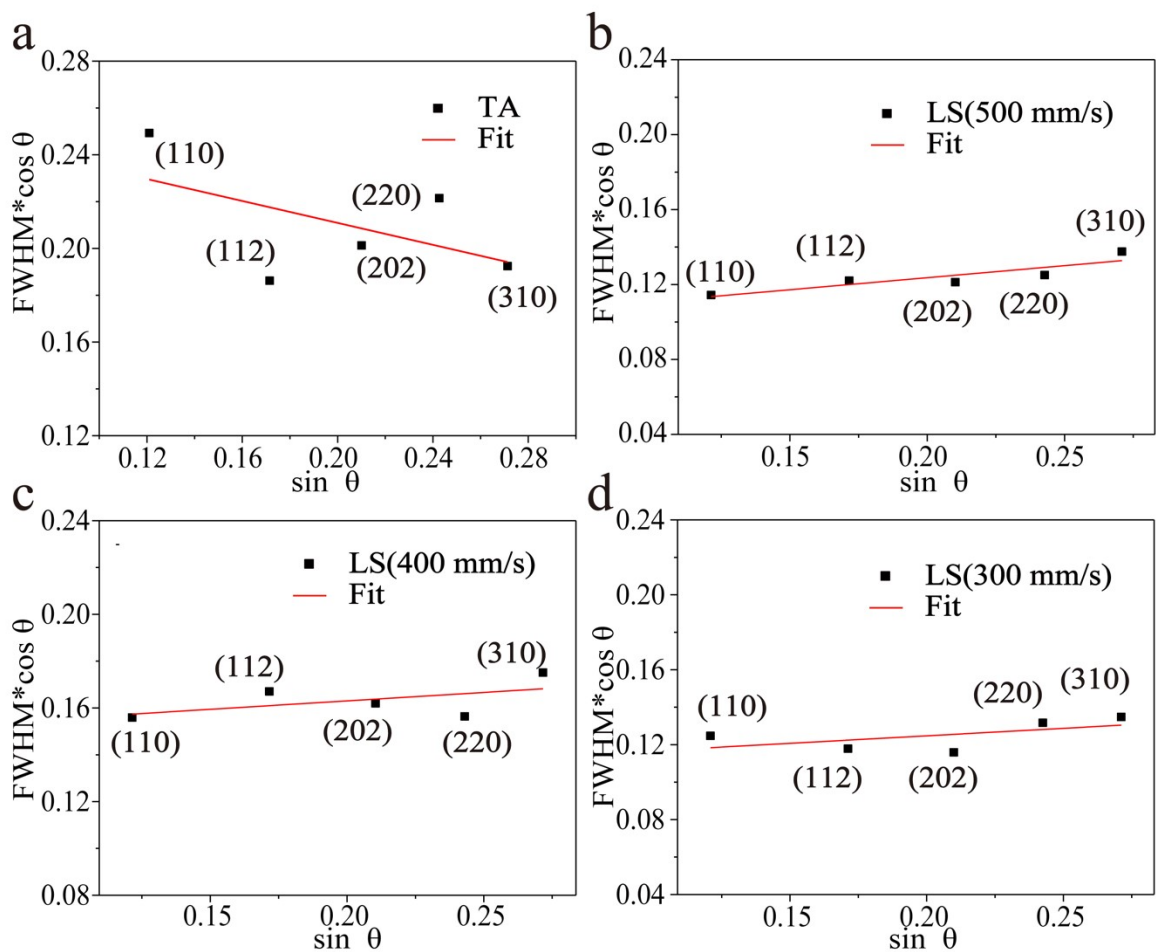

1

2 **Figure S2.** Williamson-Hall plot from X-ray diffraction patterns of perovskite film fabricated  
 3 by thermal-annealing and laser scanning processes. a) Thermal annealing, b) Laser scanning  
 4 speed 500 mm/s, c) Laser scanning speed 400 mm/s, d) Laser scanning speed 300 mm/s.

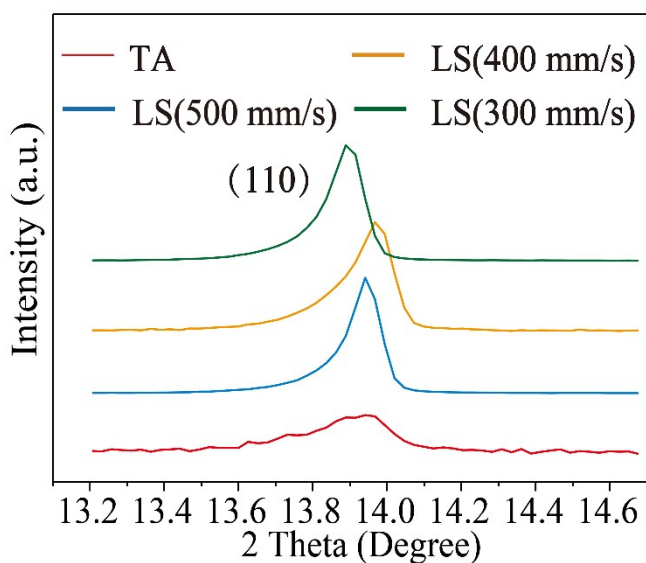

5

6 **Figure S3.** Magnified X-ray diffraction patterns between 13.2° and 14.6°.

1

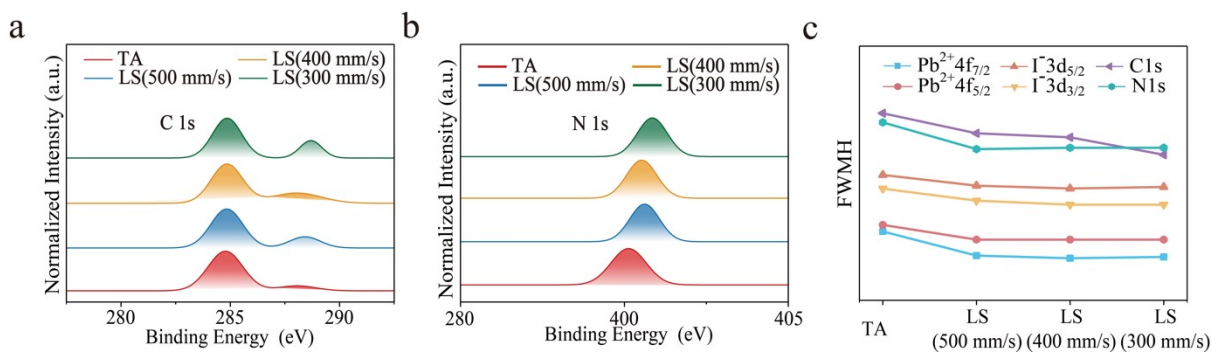

2

3 **Figure S4.** XPS pattern of FA<sub>0.95</sub>MA<sub>0.05</sub>PbI<sub>3</sub> films fabricated by thermal annealing comparison  
 4 nanosecond laser scanning.

5

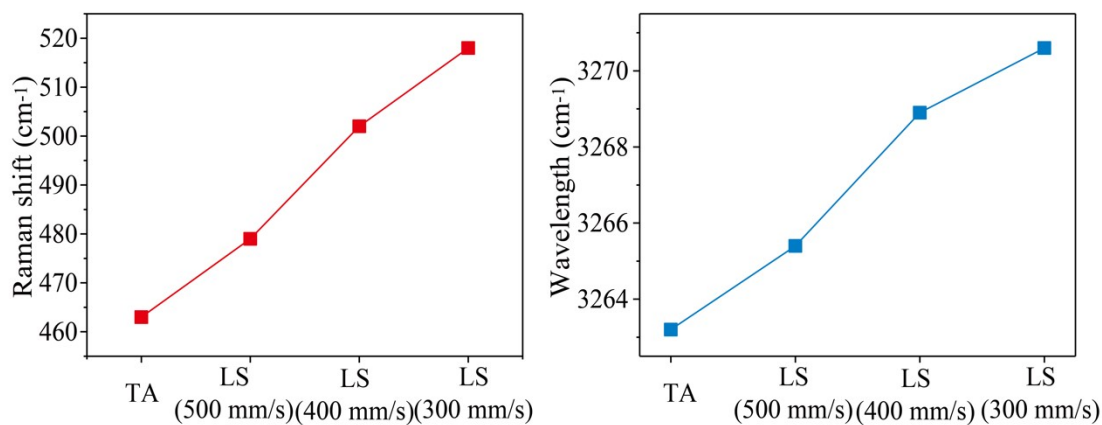

6

7 **Figure S5.** Raman and FTIR spectra appear redshift phenomenon. a)NCN bending region of  
 8 Raman spectra,b)N-H stretching part of FTIR spectra.

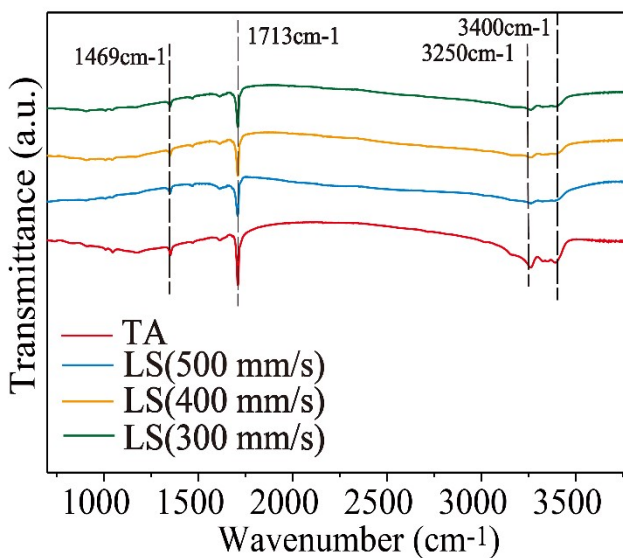

9

1 **Figure S6.** FTIR spectra of perovskite films fabricated by different conditions,  $1469\text{ cm}^{-1}$   
2 represents C-N stretching;  $1713\text{ cm}^{-1}$  represents C=O stretching;  $3200\text{ cm}^{-1}$  represents N-H  
3 stretching;  $3400\text{ cm}^{-1}$  represents C-H stretching.

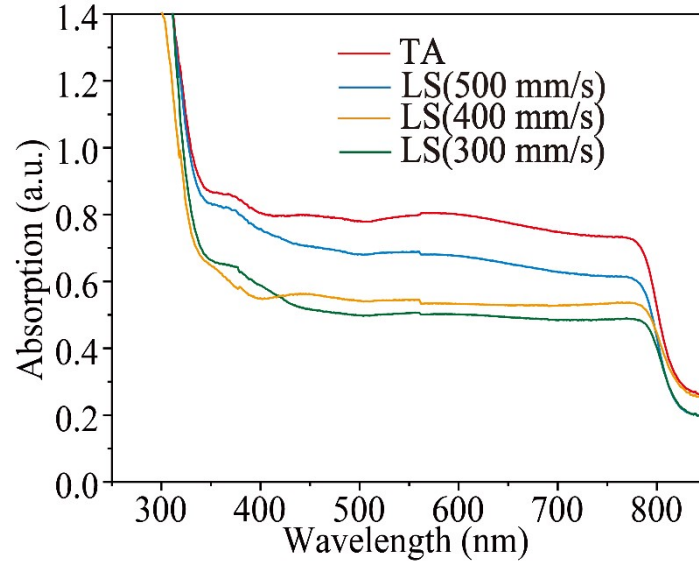

4

5

6 **Figure S7.** UV-VIS absorption spectra of perovskite film fabricated by thermal-annealing and  
7 laser scanning processes.

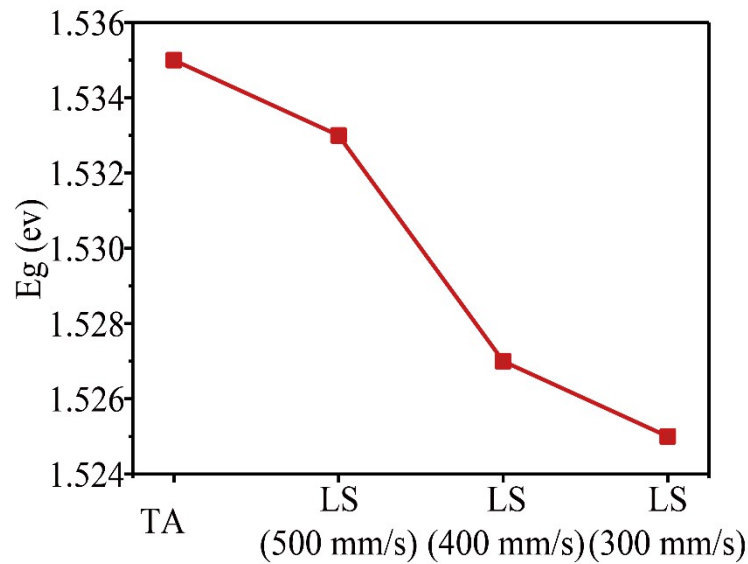

8

9 **Figure S8.**  $E_g$  of perovskite film fabricated by thermal-annealing and laser scanning processes.

10

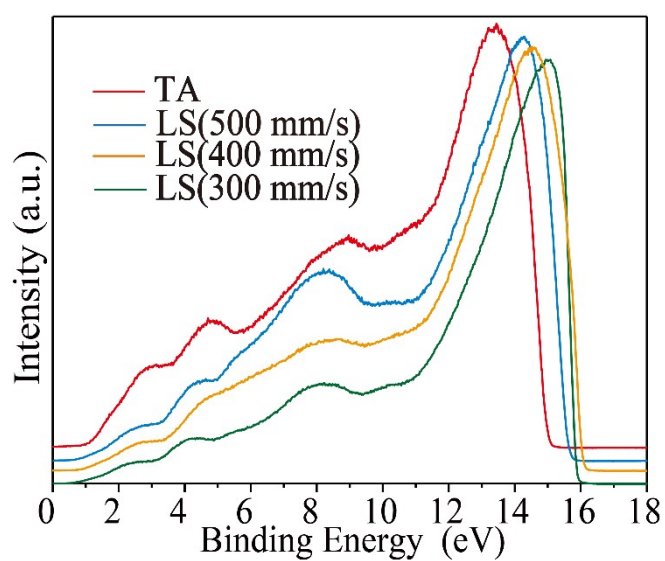

1

2 **Figure S9.** UPS spectra under different fabricate conditions of perovskite  
3 films.

4

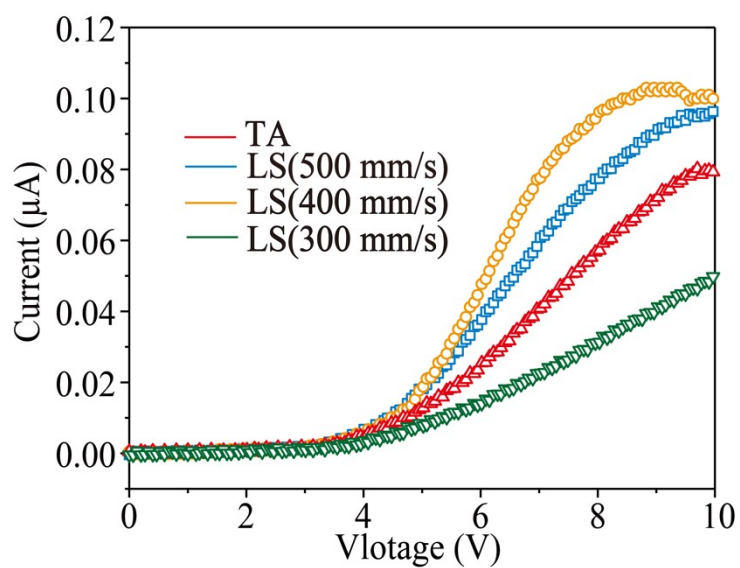

5

6 **Figure S10.** Dark current curve for  $\text{FA}_{0.95}\text{MA}_{0.05}\text{PbI}_3$  photodetector.

7

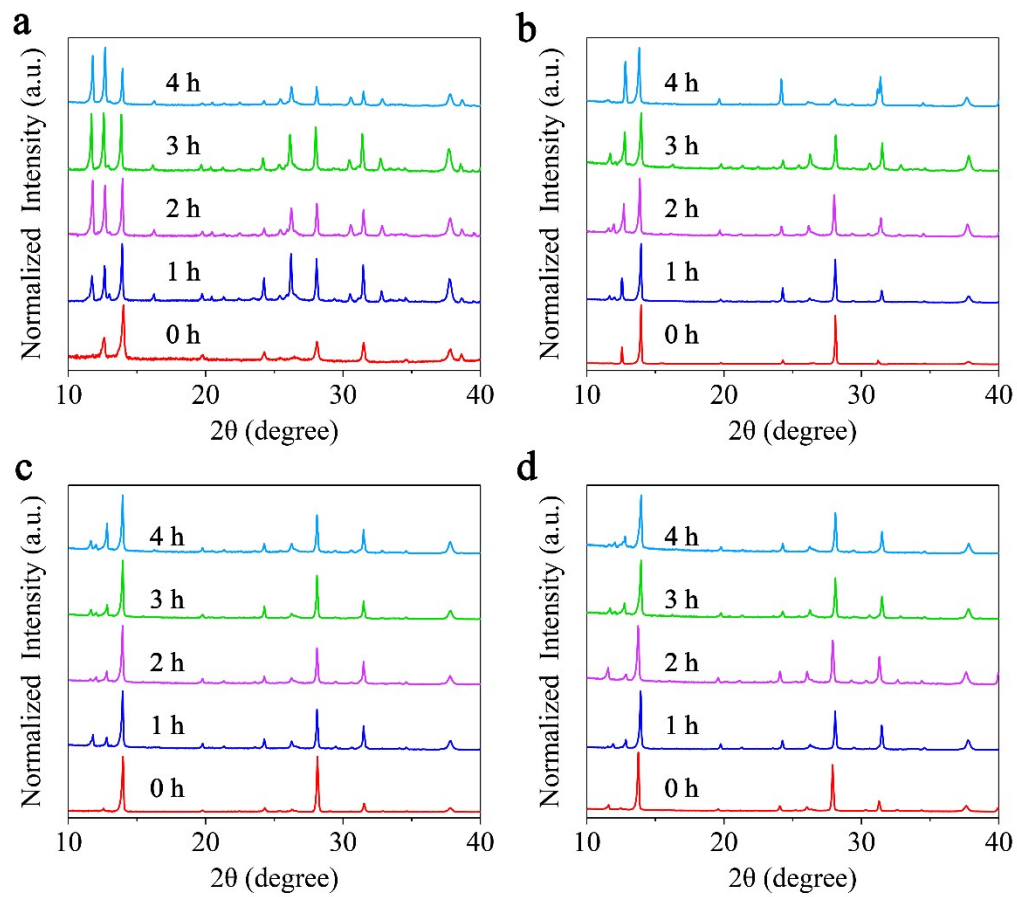

1

2 **Figure S11.** The XRD patterns of a) TA, b) LS(500 mm/s), c) LS(400 mm/s), d) LS(300 mm/s)  
 3 were kept at 150 °C for different time, with in 85% relative humidity.

4

5

6
